# Supplementary material for: Polypyrrole coated δ-MnO2 nanosheet arrays as a highly stable lithium-ion-storage anode
Source: Royal Society of Chemistry journal article supplement (doi:10.1039/d0dt01658f), 2020-01-01
Supplement: d0dt01658f1.pdf [file d0dt01658f1.pdf]

Supplementary Information for

## Polypyrrole Coated $\delta$ -MnO<sub>2</sub> Nanosheet Arrays as Highly Stable Lithium-ion-storage Anode

Yiming Sui,<sup>1,2</sup> Chaofeng Liu,<sup>1</sup> Peichao Zou,<sup>2</sup> Houchao Zhan,<sup>2</sup> Yuanzheng Cui,<sup>2</sup> Cheng Yang,<sup>2,\*</sup>

Guozhong Cao<sup>1,\*</sup>

<sup>1</sup>Department of Materials Science and Engineering, University of Washington, Seattle, WA 98195, USA

<sup>2</sup>Division of Energy and Environment, Tsinghua Shenzhen International Graduate School, Tsinghua University, Shenzhen 518055, China

Email: Cheng Yang: yang.cheng@shenzhen.tsinghua.edu.cn, Guozhong Cao: gzcao@uw.edu

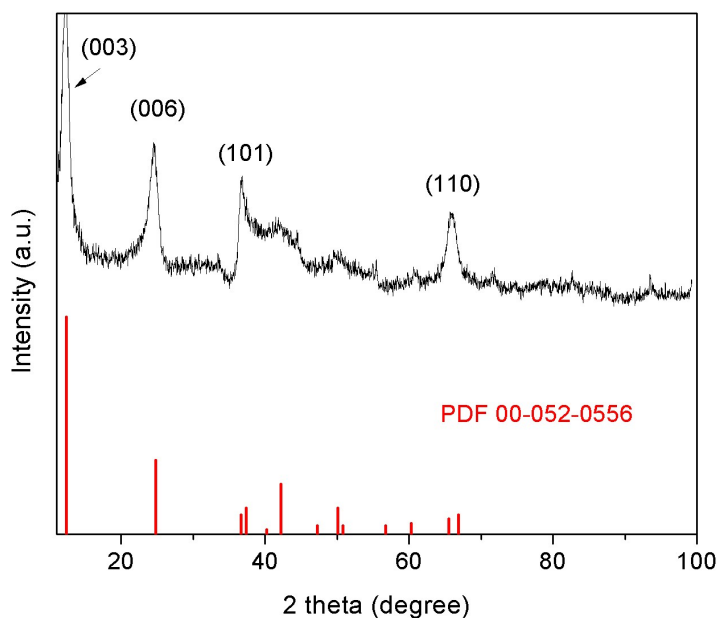

**Figure S1.** XRD pattern of decomposition products of KMnO<sub>4</sub>.

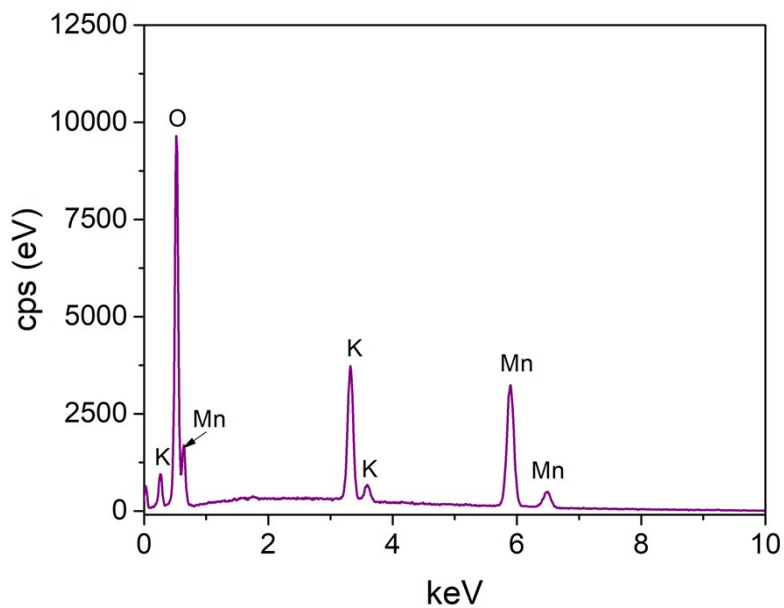

**Figure S2.** EDS pattern of decomposition products of  $\text{KMnO}_4$ .

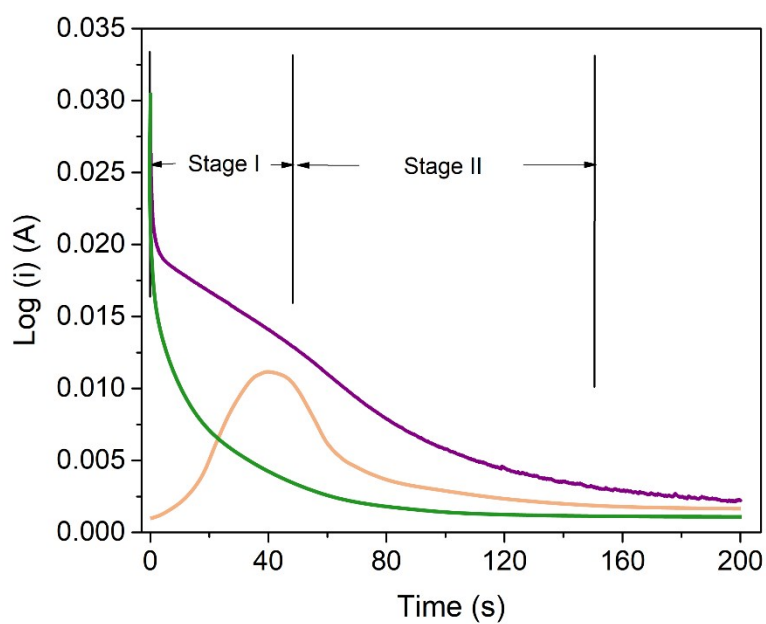

**Figure S3.** Chronoamperometric graph of PPy electrodeposition at the potential of 1.2 V (vs. Ag/AgCl) which could be divided into two stages and two separate curves.

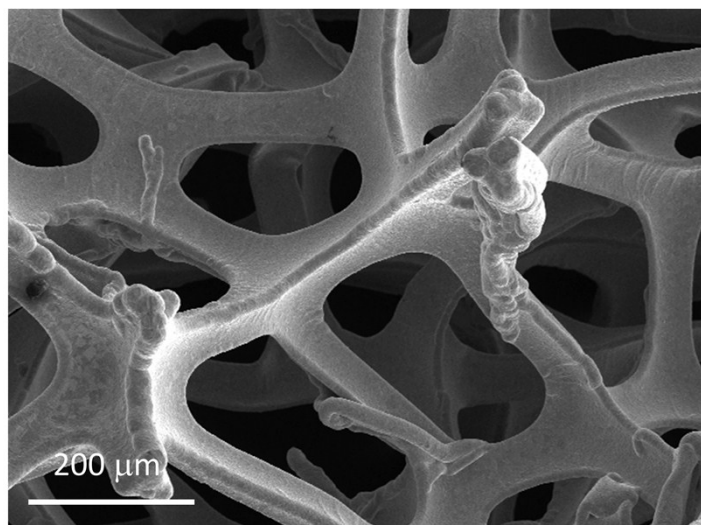

**Figure S4.** SEM image of bare nickel foam at the scale bar of 200  $\mu\text{m}$ .

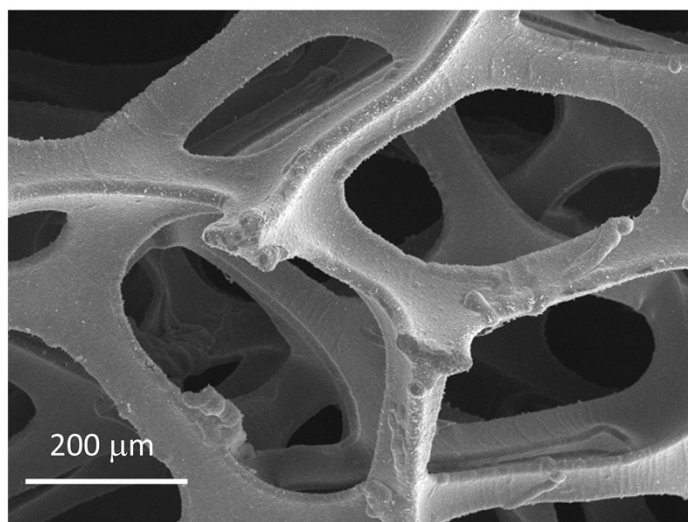

**Figure S5.** SEM image of MnO<sub>2</sub>@PPy/NF-50 at the scale bar of 200  $\mu\text{m}$ .

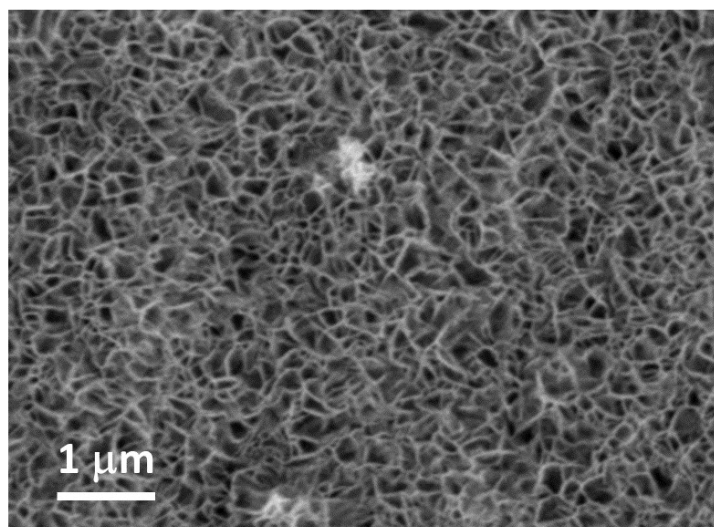

**Figure S6.** SEM image of  $\text{MnO}_2@\text{PPy}/\text{NF-50}$  at the scale bar of 1  $\mu\text{m}$ .

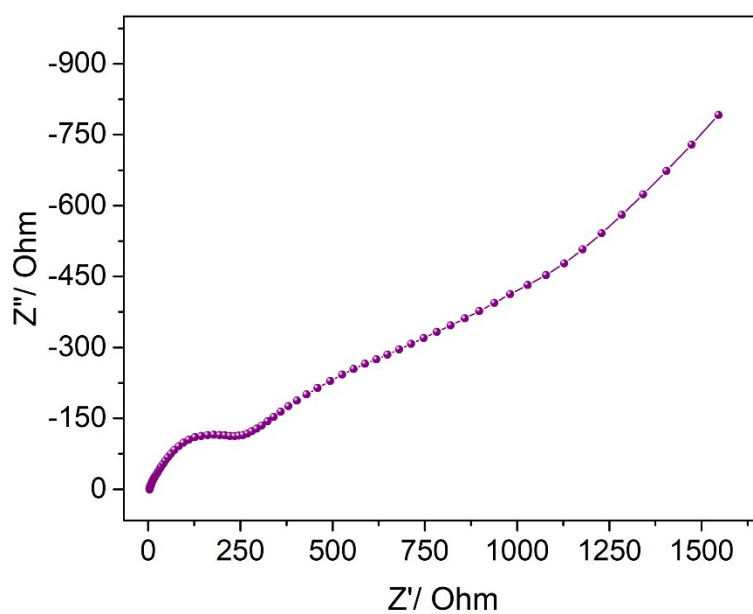

**Figure S7.** Electrochemical impedance spectra of the  $\text{MnO}_2@\text{PPy}/\text{NF-50}$  electrodes in the frequency range of 100 kHz – 0.01 Hz.

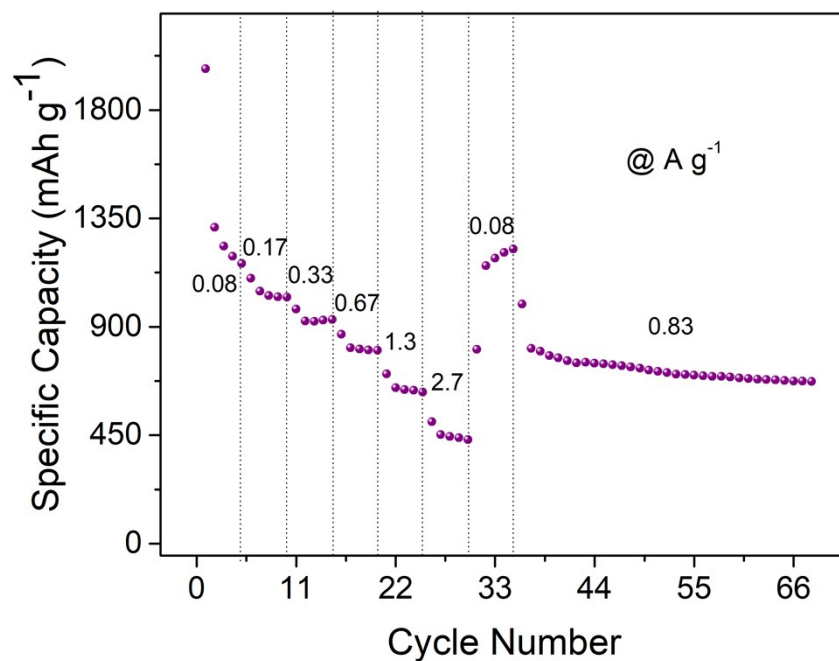

**Figure S8.** Rate capacities of MnO<sub>2</sub>@PPy/NF-50 electrodes at various current densities.

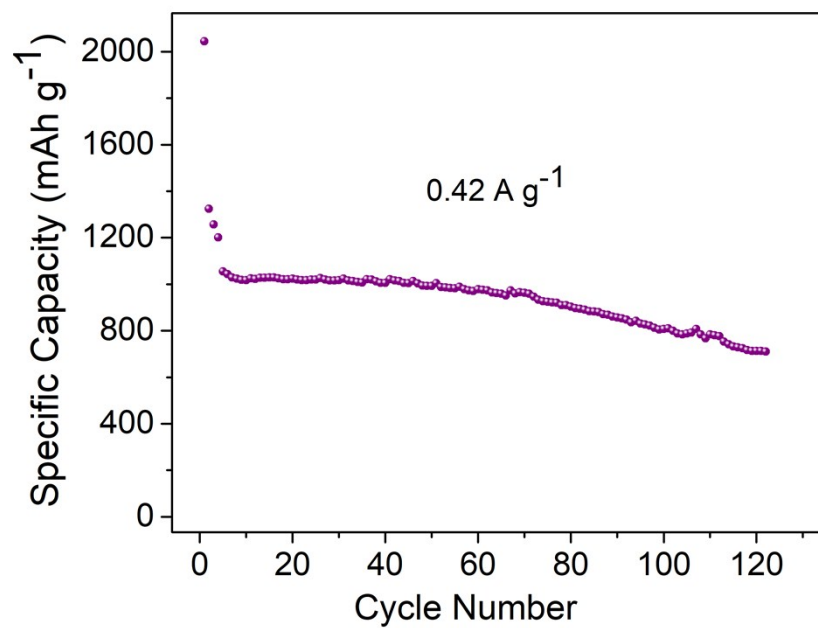

**Figure S9.** Cycling performance of the MnO<sub>2</sub>@PPy/NF-50 electrodes at the current density of 0.42 A g<sup>-1</sup>.
